# Supplementary material for: Association of Plasma Claudin-5 with Age and Alzheimer Disease
Source: MDPI journal article supplement (doi:10.3390/ijms25031419), 2024-01-24
Supplement: s1 [file s1]

**International Journal of Molecular Sciences**

**Supplementary Material**

**Association of plasma claudin-5 with age and Alzheimer disease**

**Keisuke Tachibana <sup>1</sup>, Ryuichi Hirayama <sup>2</sup>, Naoyuki Sato <sup>2,3</sup>, Kotaro Hattori <sup>4</sup>,  
Takashi Kato <sup>5</sup>, Hiroyuki Takeda <sup>6</sup> and Masuo Kondoh <sup>1,\*</sup>**

<sup>1</sup> Graduate School of Pharmaceutical Sciences, Osaka University, Osaka, Japan

<sup>2</sup> Graduate School of Medicine, Osaka University, Osaka 565-0871, Japan

<sup>3</sup> Department of Aging Neurobiology, Center for Development of Advanced Medicine for Dementia, National Center for Geriatrics and Gerontology, Aichi 474-8511, Japan

<sup>4</sup> Medical Genome Center, National Institute of Neuroscience, National Center of Neurology and Psychiatry, Kodaira, Tokyo 187-8502, Japan

<sup>5</sup> Department of Clinical and Experimental Neuroimaging, National Center for Geriatrics and Gerontology, Aichi 474-8511, Japan

<sup>6</sup> Proteo-Science Center, Ehime University, Ehime 790-8577, Japan

\* Correspondence: masuo@phs.osaka-u.ac.jp; Tel/Fax: 81-6-6879-8195.

A.

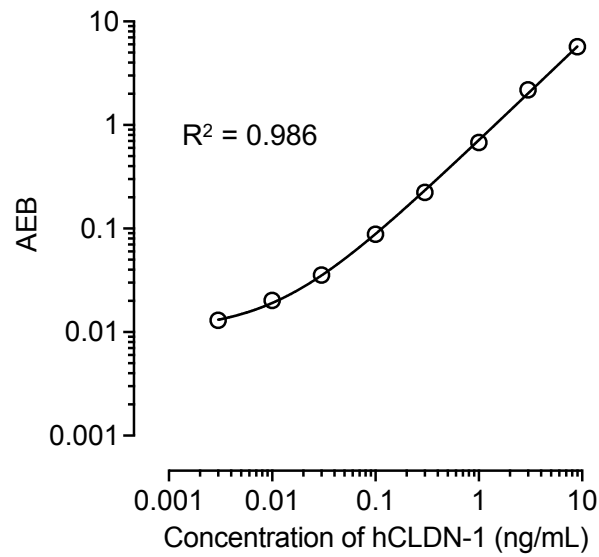

B.

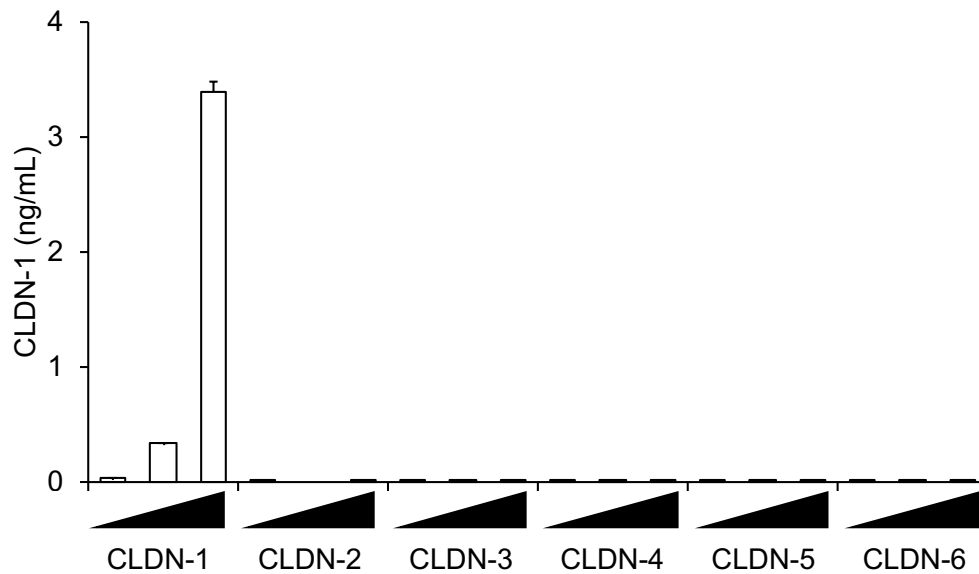

**Supplementary Figure S1.** Sensitivity and specificity of a plasma human claudin (CLDN) 1 protein detection system using Simoa. (A) Response curve of the Simoa assay for the detection of human CLDN-1. Data are given as mean  $\pm$  standard deviation ( $n = 5$ ). Standard curves were generated by using a four-parameter logistic model, and R-squared values were calculated. (B) Analysis of the specificity of CLDN-1 detection using Simoa. Proteoliposomes containing human CLDN-1 to -6 were tested at concentrations of 0.03, 0.3, and 3 ng/mL. Data are given as mean  $\pm$  standard deviation ( $n = 3$ ).

**Supplementary Table S1.** Analysis of the sensitivity and specificity of the Simoa-based human claudin (CLDN) 5 protein detection system. This table contains the data used for the graphs in Figure 1C (n = 3).

| CLDN   | Theoretical concentration<br>(ng/mL) | Actual concentration (ng/mL) |       |
|--------|--------------------------------------|------------------------------|-------|
|        |                                      | Mean                         | SD    |
| CLDN-1 | 0.03                                 | 0.002                        | 0.001 |
|        | 0.3                                  | 0.001                        | 0.000 |
|        | 3                                    | 0.001                        | 0.000 |
| CLDN-2 | 0.03                                 | 0.002                        | 0.000 |
|        | 0.3                                  | 0.002                        | 0.000 |
|        | 3                                    | 0.001                        | 0.001 |
| CLDN-3 | 0.03                                 | 0.001                        | 0.000 |
|        | 0.3                                  | 0.001                        | 0.000 |
|        | 3                                    | 0.001                        | 0.000 |
| CLDN-4 | 0.03                                 | 0.002                        | 0.000 |
|        | 0.3                                  | 0.002                        | 0.000 |
|        | 3                                    | 0.002                        | 0.000 |
| CLDN-5 | 0.03                                 | 0.035                        | 0.004 |
|        | 0.3                                  | 0.365                        | 0.005 |
|        | 3                                    | 3.622                        | 0.014 |
| CLDN-6 | 0.03                                 | 0.001                        | 0.000 |
|        | 0.3                                  | 0.001                        | 0.001 |
|        | 3                                    | 0.001                        | 0.000 |

SD, standard deviation.

**Supplementary Table S2.** Precision and accuracy of quantification of human CLDN-1 concentration series.

| Theoretical<br>concentration<br>(ng/mL) | Actual concentration (ng/mL) |       |       |       |       | Mean<br>(ng/mL) | SD    | CV<br>(%) | Accuracy |
|-----------------------------------------|------------------------------|-------|-------|-------|-------|-----------------|-------|-----------|----------|
|                                         | 1                            | 2     | 3     | 4     | 5     |                 |       |           |          |
| 0                                       | 0.002                        | ND    | 0.000 | ND    | 0.001 | 0.001           | 0.001 | 95.79     | NA       |
| 0.003                                   | 0.003                        | 0.003 | 0.004 | 0.004 | 0.000 | 0.003           | 0.002 | 53.96     | 94.84    |
| 0.01                                    | 0.010                        | 0.015 | 0.009 | 0.012 | 0.011 | 0.011           | 0.002 | 18.59     | 114.03   |
| 0.03                                    | 0.030                        | 0.031 | 0.029 | 0.030 | 0.032 | 0.030           | 0.001 | 3.84      | 101.07   |
| 0.1                                     | 0.097                        | 0.101 | 0.108 | 0.091 | 0.099 | 0.099           | 0.006 | 6.09      | 99.31    |
| 0.3                                     | 0.281                        | 0.271 | 0.292 | 0.293 | 0.289 | 0.285           | 0.009 | 3.17      | 95.12    |
| 1                                       | 0.998                        | 0.914 | 0.914 | 0.938 | 0.952 | 0.943           | 0.035 | 3.69      | 94.31    |
| 3                                       | 3.311                        | 3.129 | 3.137 | 3.411 | 3.275 | 3.253           | 0.120 | 3.69      | 108.42   |
| 9                                       | 9.549                        | 9.216 | 9.488 | 7.058 | 9.274 | 8.917           | 1.049 | 11.76     | 99.08    |

CV, coefficient of variation; NA, not applicable; ND, not detected; SD, standard deviation.

**Supplementary Table S3.** Analysis of the sensitivity and specificity of the Simoa-based human claudin (CLDN) 1 protein detection system. This table contains the data used for the graphs in Supplementary figure S1B (n = 3).

| CLDN   | Theoretical concentration<br>(ng/mL) | Actual concentration (ng/mL) |       |
|--------|--------------------------------------|------------------------------|-------|
|        |                                      | Mean                         | SD    |
| CLDN-1 | 0.03                                 | 0.031                        | 0.002 |
|        | 0.3                                  | 0.330                        | 0.006 |
|        | 3                                    | 3.386                        | 0.092 |
| CLDN-2 | 0.03                                 | 0.001                        | NA    |
|        | 0.3                                  | ND                           | NA    |
|        | 3                                    | 0.001                        | 0.000 |
| CLDN-3 | 0.03                                 | 0.000                        | NA    |
|        | 0.3                                  | 0.000                        | 0.000 |
|        | 3                                    | 0.000                        | NA    |
| CLDN-4 | 0.03                                 | 0.000                        | 0.000 |
|        | 0.3                                  | 0.002                        | NA    |
|        | 3                                    | 0.002                        | NA    |
| CLDN-5 | 0.03                                 | 0.001                        | 0.001 |
|        | 0.3                                  | 0.001                        | 0.001 |
|        | 3                                    | 0.001                        | 0.001 |
| CLDN-6 | 0.03                                 | 0.001                        | NA    |
|        | 0.3                                  | 0.001                        | 0.000 |
|        | 3                                    | 0.001                        | 0.001 |

NA, not applicable; ND, not detected; SD, standard deviation.
